# Supplementary material for: Speech-Derived Digital Markers of Treatment Response and Improvement Trajectories in Pediatric Anxiety
Source: Research Square preprint supplement (doi:10.21203/rs.3.rs-9682555/v1), 2026-06-05
Supplement: Supplementary file 1 [file 84765df2234d94805607dcd6.docx]

**SUPPLEMENTARY MATERIALS**

**Table S1.** Theory-Informed Acoustic and Linguistic Features (*n* = 48)

**A. Acoustic Features** (*n* = 25)

| **Feature** | **Description** |
| --- | --- |
| ac_theory_f0env_mean | Mean fundamental frequency envelope (pitch contour) |
| ac_theory_f0env_std | Variability of pitch contour |
| ac_theory_intensity_de_mean | Mean change in intensity (energy dynamics) |
| ac_theory_intensity_de_std | Variability of intensity change |
| ac_theory_loudness_mean | Average perceived loudness |
| ac_theory_loudness_range | Range of loudness |
| ac_theory_loudness_slope | Temporal change in loudness |
| ac_theory_loudness_std | Variability in loudness |
| ac_theory_mfcc1_de_mean | Mean change in MFCC1 (spectral dynamics) |
| ac_theory_mfcc1_de_std | Variability of MFCC1 changes |
| ac_theory_mfcc1_mean | Mean MFCC1 (spectral shape) |
| ac_theory_mfcc1_std | Variability of MFCC1 |
| ac_theory_mfcc2_mean | Mean MFCC2 |
| ac_theory_mfcc3_mean | Mean MFCC3 |
| ac_theory_mfcc4_mean | Mean MFCC4 |
| ac_theory_pitch_mean | Average pitch |
| ac_theory_pitch_range | Range of pitch |
| ac_theory_pitch_sd_std | Variability of pitch standard deviation |
| ac_theory_pitch_slope | Temporal change in pitch |
| ac_theory_pitch_std | Variability of pitch |
| ac_theory_voice_prob_mean | Mean voicing probability |
| ac_theory_voice_prob_slope | Change in voicing probability |
| ac_theory_voice_prob_std | Variability of voicing |
| ac_theory_zcr_mean | Mean zero-crossing rate (signal noisiness) |
| ac_theory_zcr_std | Variability of zero-crossing rate |

*Note: Acoustic features derived from openSMILE emobase (Functionals level)*

**B. Linguistic Features** (*n = 23*)

| **Feature** | **Description** |
| --- | --- |
| ling_ling_all_or_nothing | Frequency of all-or-nothing thinking |
| ling_ling_anxiety_total | Total anxiety-related word usage |
| ling_ling_avoidance | Frequency of avoidance-related language |
| ling_ling_catastrophizing | Frequency of catastrophic thinking |
| ling_ling_confidence | Confidence-related language |
| ling_ling_coping_reappraisal | Cognitive reappraisal/coping language |
| ling_ling_depression_total | Total depression-related language |
| ling_ling_fear | Fear-related word usage |
| ling_ling_filler_ratio | Ratio of filler words (e.g., “um”, “uh”) |
| ling_ling_first_person | First-person pronoun usage |
| ling_ling_hedge_ratio | Use of hedging language (uncertainty) |
| ling_ling_insight | Insight-related language |
| ling_ling_nervousness | Nervousness-related language |
| ling_ling_positive_total | Positive emotion word usage |
| ling_ling_self_focus | Degree of self-referential language |
| ling_ling_sentiment_shift | Variability in sentiment across sentences |
| ling_ling_should_statements | Frequency of “should/must” statements |
| ling_ling_subjectivity | Subjectivity of language |
| ling_ling_type_token_ratio | Lexical diversity |
| ling_ling_uncertainty | Uncertainty-related language |
| ling_ling_vader_compound | Overall sentiment polarity |
| ling_ling_word_count | Total word count |
| ling_ling_worry | Worry-related language |

*Note: Derived from a natural language processing pipeline informed by cognitive behavioral theory and psychological linguistics.*

**
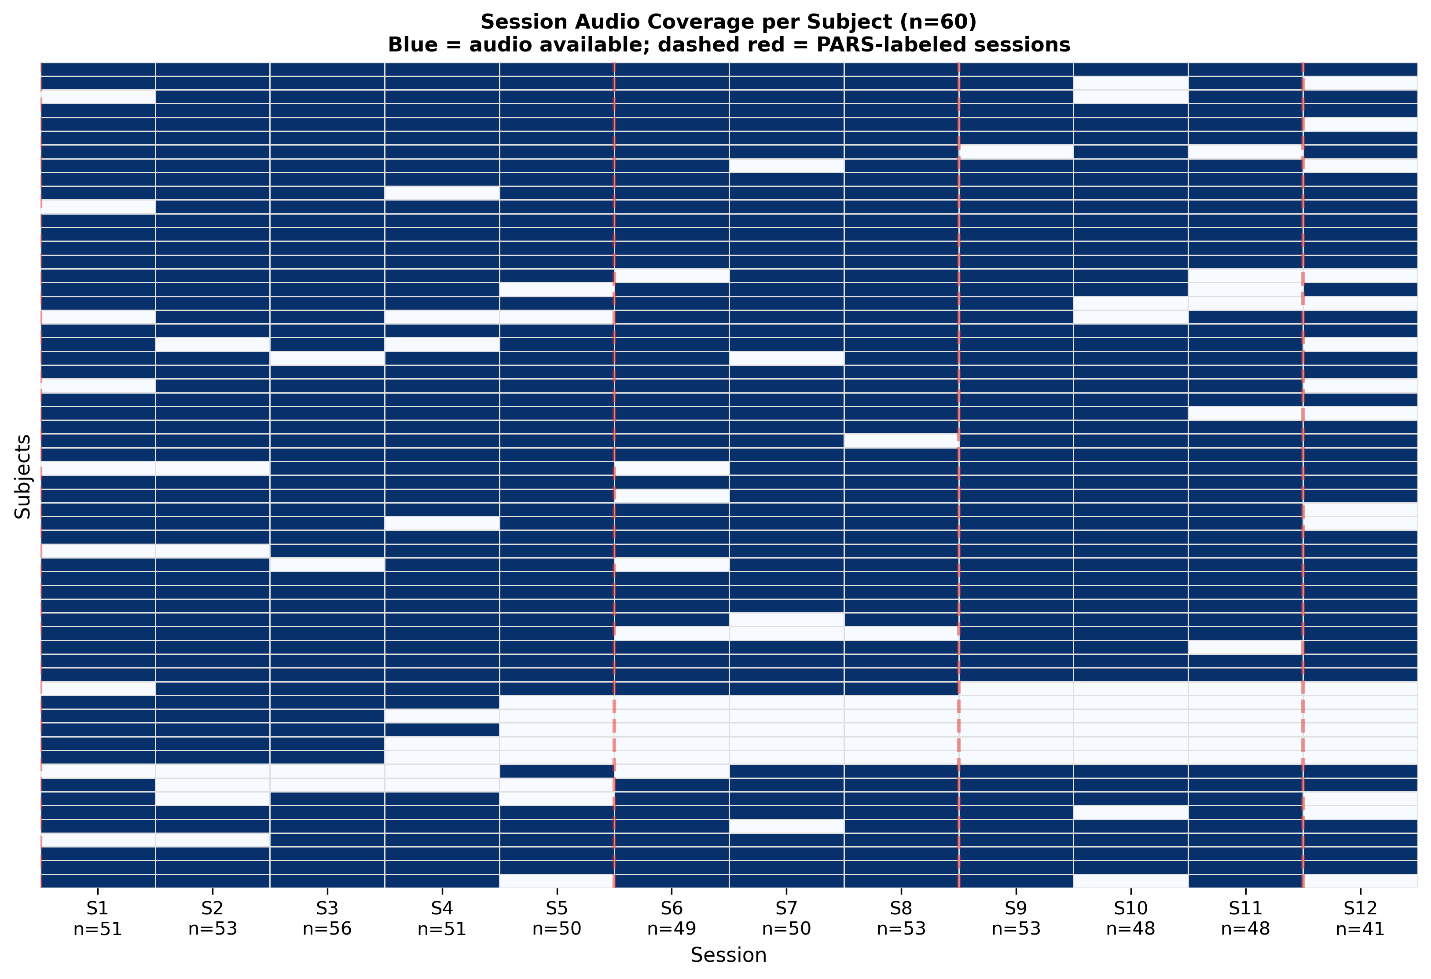
**

**Figure S1. Session-level availability of audio recordings across participants.** Heatmap showing the presence of usable audio recordings for each participant (rows) across the 12-session EF-CBT protocol (columns). Blue cells indicate sessions with available audio recordings; light gray cells indicate sessions without usable audio data. Red dashed vertical lines mark sessions with Pediatric Anxiety Rating Scale (PARS) assessments (Sessions 1, 6, 9, and 12). The number of participants contributing usable audio at each session is shown along the x-axis.


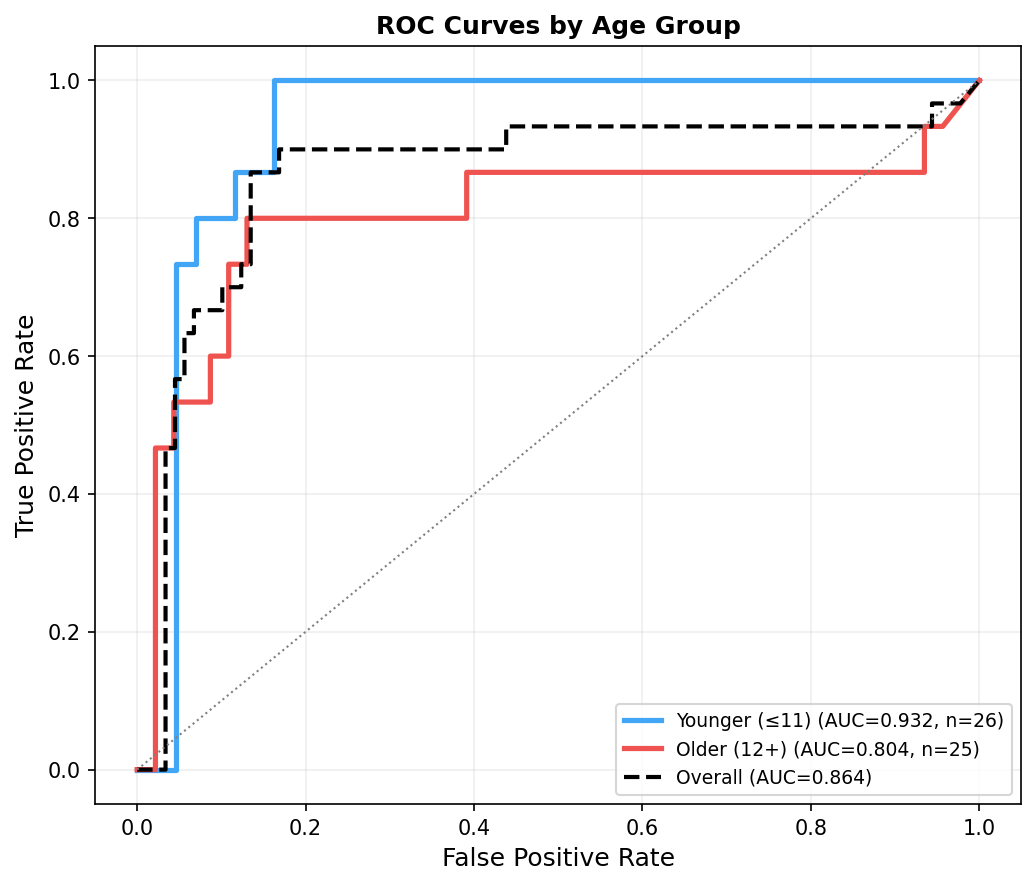


**Figure S2. Receiver operating characteristic (ROC) curves by age group for prediction of anxiety improvement.** ROC curves comparing model performance between younger (≤11 years) and older (≥12 years) participants using the best-performing model (Random Forest with later-session features in mid-to-late session pairs). The model demonstrated higher discrimination in younger participants (AUC = 0.93; *n* = 26) compared with older participants (AUC = 0.80; *n* = 25), although performance remained above chance in both groups. The dashed line represents overall model performance across all participants (AUC = 0.86).
